# Supplementary material
Source: PubMed Central journal article supplement (PMC2720671)
Supplement: 97320630003340S1.pdf [file 97320630003340S1.pdf]

### Supplementary Material

**Table 1:** Hypo-methylated genes and their associated diseases

| <u>Gene</u>               | <u>Disease</u>    | <u>References (see supplementary material)</u> |
|---------------------------|-------------------|------------------------------------------------|
| Cytochrome P450 1B1       | Prostate cancer   | Tokizane et al, 2005                           |
| Synuclein $\gamma$ (SNCG) | Breast cancer     | Liu et al 2005; Gupte et al, 2003              |
|                           | Colon cancer      | Liu et al 2005; Gupte et al, 2003              |
|                           | Ovarian cancer    | Liu et al 2005; Gupte et al, 2003              |
|                           | Prostate cancer   | Liu et al 2005; Gupte et al, 2003              |
|                           | XIST              | Prostate cancer                                |
| EPO                       | Testicular cancer | Kawakami et al, 2004                           |
|                           | Breast cancer     | Acs et al, 2001                                |
| MTA1                      | Prostate cancer   | Arcasoy et al, 2005                            |
|                           | Breast cancer     | Kumar et al, 2003                              |
| HMG-I(Y)                  | Colon cancer      | Toh et al, 2004                                |
|                           | Pancreatic cancer | Moon et al, 2004                               |
|                           | Prostate cancer   | Hofer et al, 2004                              |
|                           | Lung cancer       | Sasaky et al, 2002                             |
|                           | Colon cancer      | abe et al, 1999                                |
| Maspin                    | Prostate cancer   | Takaha et al, 2002, 2004                       |
|                           | Colon cancer      | Bettstetter et al, 2005                        |
| TRAG-3                    | Lung cancer       | Yatabe et al, 2004                             |
|                           | Ovarian cancer    | Sood et al, 2002                               |
|                           | Pancreatic cancer | Sato et al, 2003, 2004                         |
|                           | Colon cancer      | Yao et al, 2004                                |
| IGF2/H19                  | Lung cancer       | Yao et al, 2004                                |
|                           | Ovarian cancer    | Yao et al, 2004                                |
|                           | Pancreatic cancer | Yao et al, 2004                                |
|                           | Colon cancer      | Cui et al, 2002                                |
|                           | Lung cancer       | Kondo et al, 1995                              |
| S100P Claudin-4           | Pancreatic cancer | Sato et al, 2003, 2004                         |
| S100A4                    | Pancreatic cancer | Sato et al, 2003, 2004                         |
| 14-3-3sigma               | Pancreatic cancer | Sato et al, 2003, 2004                         |
| trefoil factor 2          | Pancreatic cancer | Sato et al, 2003, 2004                         |
| mesothelin                | Pancreatic cancer | Sato et al, 2003, 2004                         |
| CDKN1C                    | Pancreatic cancer | Scelfo et al, 2002                             |
| Protease uPA              | Breast cancer     | Guo et al, 2002                                |
| P-Cadherin                | Breast cancer     | Paredes et al, 2005                            |
| BAGE                      | Breast cancer     | Grunau et al, 2005                             |
|                           | Ovarian cancer    | Grunau et al, 2005                             |
|                           | Testicular cancer | Grunau et al, 2005                             |
| pS2                       | Breast cancer     | Martin et al, 1997                             |
| CAGE                      | Breast cancer     | Cho et al 2003                                 |
|                           | Lung cancer       | Cho et al 2003                                 |
| PEG1/MEST                 | Lung cancer       | Nakanishi et al, 2004                          |
| DIRAS3                    | Breast cancer     | Yu et al, 1999                                 |
| RB1                       | Breast cancer     | Zheng and Lee, 2002                            |
|                           | Lung cancer       | Zheng and Lee, 2002                            |
| BRCA1                     | Ovarian cancer    | Chan et al, 2002                               |
| BRCA2                     | Ovarian cancer    | Chan et al, 2002                               |
| p53                       | Lung cancer       | Woodson et al, 2001                            |
| MAGEA1                    | Testicular cancer | DeSmet et al, 2004                             |
| MAGEA3                    | Testicular cancer | DeSmet et al, 2004                             |
| CTCF                      | Testicular cancer | Klenova et al, 2002                            |
